# Supplementary material
Source: Springer Nature journal article supplement (https://www.springermedizin.de/resource/supplementary/12888_2007_225_MOESM2_ESM.doc/9482228)
Supplement: MOESM2 [file 9482228]

FIGURE 2
